# Supplementary material for: Immobilization of isolated dimethyltin species on crystalline silicates through surface modification of layered octosilicate
Source: Royal Society of Chemistry journal article supplement (doi:10.1039/d3dt03231k), 2023-01-01
Supplement: d3dt03231k1.pdf [file d3dt03231k1.pdf]

## Electronic Supplementary Information

### Immobilization of Isolated Dimethyltin Species on Crystalline Silicates through Surface Modification of Layered Octosilicate

Masashi Yatomi,<sup>a</sup> Takuya Hikino,<sup>b</sup> Seiji Yamazoe,<sup>c</sup> Kazuyuki Kuroda,<sup>a, d</sup> Atsushi Shimojima\*<sup>a, d</sup>

<sup>a</sup>Department of Applied Chemistry, Faculty of Science and Engineering, Waseda University, 3-4-1 Okubo, Shinjuku-ku, Tokyo 169-8555 (Japan).

<sup>b</sup>Department of Advanced Science and Engineering, Faculty of Science and Engineering, Waseda University, 3-4-1 Okubo, Shinjuku-ku, Tokyo 169-8555 (Japan).

<sup>c</sup>Department of Chemistry, Graduate School of Science, Tokyo Metropolitan University, 1-1 Minami-osawa, Hachioji, Tokyo 192-0397 (Japan).

<sup>d</sup>Kagami Memorial Research Institute for Materials Science and Technology, Waseda University, 2-8-26 Nishiwaseda, Shinjuku-ku, Tokyo 169-0051 (Japan).

## Contents

|                                                                                                                                                                                |   |
|--------------------------------------------------------------------------------------------------------------------------------------------------------------------------------|---|
| Fig. S1 Powder XRD patterns of (a) Na-Oct, (b) C <sub>16</sub> TMA-Oct, and (c) H-Oct. ....                                                                                    | 3 |
| Fig. S2 FT-IR spectra of (a) Na-Oct, (b) C <sub>16</sub> TMA-Oct, and (c) H-Oct. ....                                                                                          | 3 |
| Fig. S3 <sup>29</sup> Si MAS NMR spectra of (a) Na-Oct, (b) C <sub>16</sub> TMA-Oct, and (c) H-Oct.....                                                                        | 4 |
| Table S1 Chemical shifts and integral intensity ratios of the <sup>29</sup> Si MAS NMR signals (Fig. S3) for Na-Oct, C <sub>16</sub> TMA-Oct, and H-Oct. ....                  | 4 |
| Table S2 Carbon, nitrogen, silicon, and sodium contents in Na-Oct, C <sub>16</sub> TMA-Oct, H-Oct, and Me <sub>2</sub> Si-Oct. ....                                            | 5 |
| Fig. S4 <sup>13</sup> C CP/MAS NMR spectrum of C <sub>16</sub> TMA-Oct. ....                                                                                                   | 5 |
| The signals were assigned according to the previous report. <sup>1</sup> .....                                                                                                 | 5 |
| Fig. S5 FT-IR spectra of (black line) Me <sub>2</sub> Sn-Oct <sub>10</sub> and (red line) Me <sub>2</sub> Sn-Oct <sub>10</sub> after drying.....                               | 6 |
| Scheme S1 Possible reaction scheme for the elimination of two C <sub>16</sub> TMA <sup>+</sup> cations by the reaction of one Me <sub>2</sub> SnCl <sub>2</sub> molecule. .... | 6 |
| Fig. S6 <sup>29</sup> Si MAS NMR spectra of (a) H-Oct and (b) H-Oct <sub>heat</sub> .....                                                                                      | 7 |
| Fig. S7 <sup>13</sup> C CP/MAS NMR spectrum of H-Oct <sub>heat</sub> .....                                                                                                     | 8 |
| Fig. S8 Powder XRD patterns of (a) H-Oct and (b) H-Oct <sub>heat</sub> . ....                                                                                                  | 8 |
| Fig. S9 <sup>29</sup> Si MAS NMR spectrum of Me <sub>2</sub> Si-Oct.....                                                                                                       | 9 |

|                                                                                                                                                                                        |    |
|----------------------------------------------------------------------------------------------------------------------------------------------------------------------------------------|----|
| Table S3 Integral intensity ratios of the $^{29}\text{Si}$ MAS NMR signals (Fig. S9) and the degree of silylation for $\text{Me}_2\text{Si-Oct}$ . .....                               | 9  |
| Fig. S10 Powder XRD pattern of $\text{Me}_2\text{Si-Oct}$ . .....                                                                                                                      | 9  |
| Scheme S2 (a) A possible mechanism that explains the limited degree of dimethyltin-modification (approximately 50%). (b) A possible structure of $\text{Me}_2\text{Sn-Oct}_{10}$ ..... | 10 |
| Fig. S11 UV–Vis spectrum of dimethyltin oxide. ....                                                                                                                                    | 11 |
| Table S4 The values of the absorption edge for each spectrum. ....                                                                                                                     | 11 |
| Fig. S12 A structural model of dimethyltin oxide. ....                                                                                                                                 | 12 |
| Fig. S13 A structural model of $\text{Me}_2\text{Sn-Oct}_X$ .....                                                                                                                      | 12 |
| <b>References</b> .....                                                                                                                                                                | 13 |

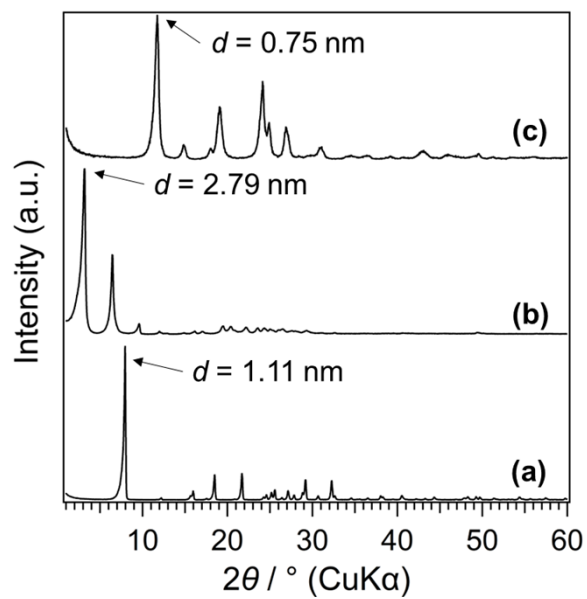

Fig. S1 Powder XRD patterns of (a) Na-Oct, (b) C<sub>16</sub>TMA-Oct, and (c) H-Oct.

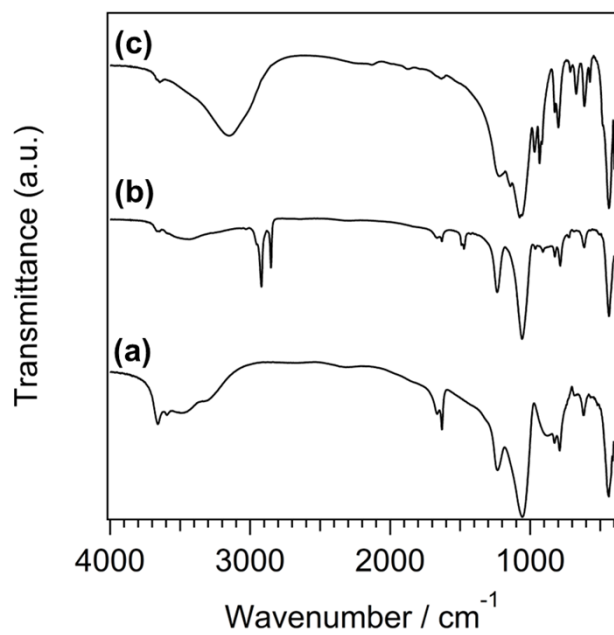

Fig. S2 FT-IR spectra of (a) Na-Oct, (b) C<sub>16</sub>TMA-Oct, and (c) H-Oct.

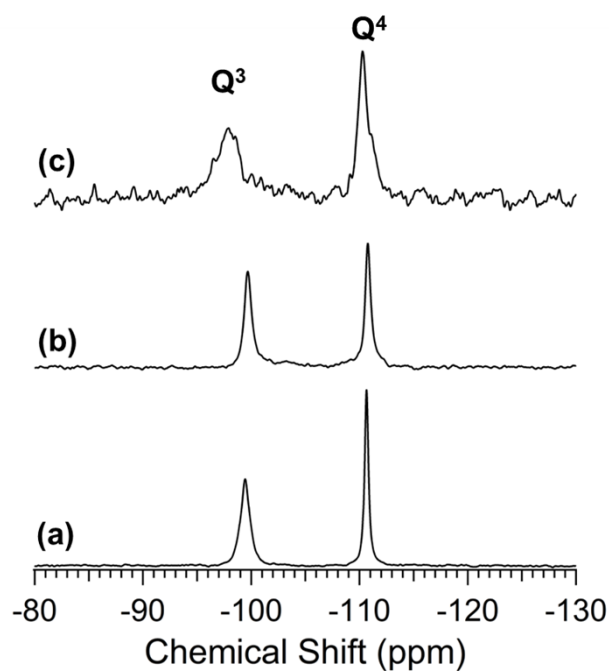

Fig. S3  $^{29}\text{Si}$  MAS NMR spectra of (a) Na-Oct, (b)  $\text{C}_{16}\text{TMA-Oct}$ , and (c) H-Oct.

Table S1 Chemical shifts and integral intensity ratios of the  $^{29}\text{Si}$  MAS NMR signals (Fig. S3) for Na-Oct,  $\text{C}_{16}\text{TMA-Oct}$ , and H-Oct.

| Samples                       | Chemical Shift (ppm) |                | Integral intensity ratio       |
|-------------------------------|----------------------|----------------|--------------------------------|
|                               | Q <sup>3</sup>       | Q <sup>4</sup> | Q <sup>3</sup> /Q <sup>4</sup> |
| Na-Oct                        | -100                 | -111           | 1.00                           |
| $\text{C}_{16}\text{TMA-Oct}$ | -100                 | -111           | 1.00                           |
| H-Oct                         | -98                  | -110           | 1.00                           |

Table S2 Carbon, nitrogen, silicon, and sodium contents in Na-Oct, C<sub>16</sub>TMA-Oct, H-Oct, and Me<sub>2</sub>Si-Oct.

| Samples                 | C / wt% | N / wt% | Si / wt% | Na / wt% |
|-------------------------|---------|---------|----------|----------|
| Na-Oct                  | -       | -       | 30.6     | 5.4      |
| C <sub>16</sub> TMA-Oct | 36.8    | 2.4     | 18.7     | 0.3      |
| H-Oct                   | -       | -       | 41.9     | 0.5      |
| Me <sub>2</sub> Si-Oct  | 5.2     | 0.3     | 40.6     | -        |

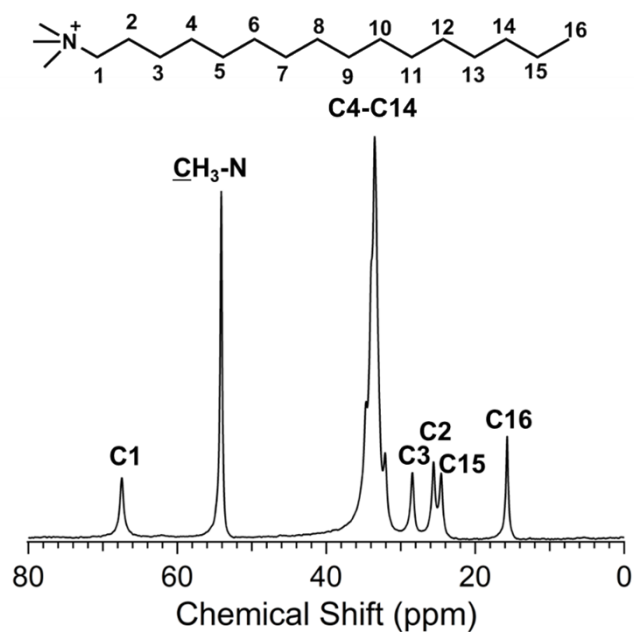

Fig. S4 <sup>13</sup>C CP/MAS NMR spectrum of C<sub>16</sub>TMA-Oct. The signals were assigned according to the previous report.<sup>1</sup>

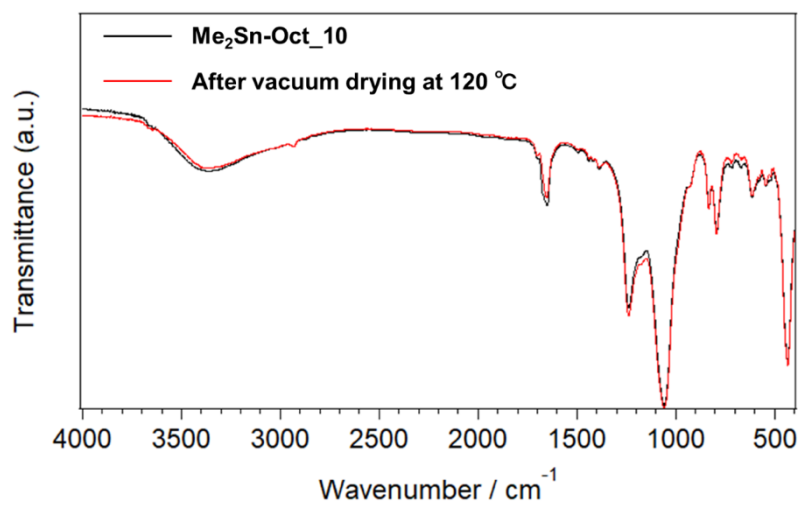

Fig. S5 FT-IR spectra of (black line) Me<sub>2</sub>Sn-Oct<sub>10</sub> and (red line) Me<sub>2</sub>Sn-Oct<sub>10</sub> after drying.

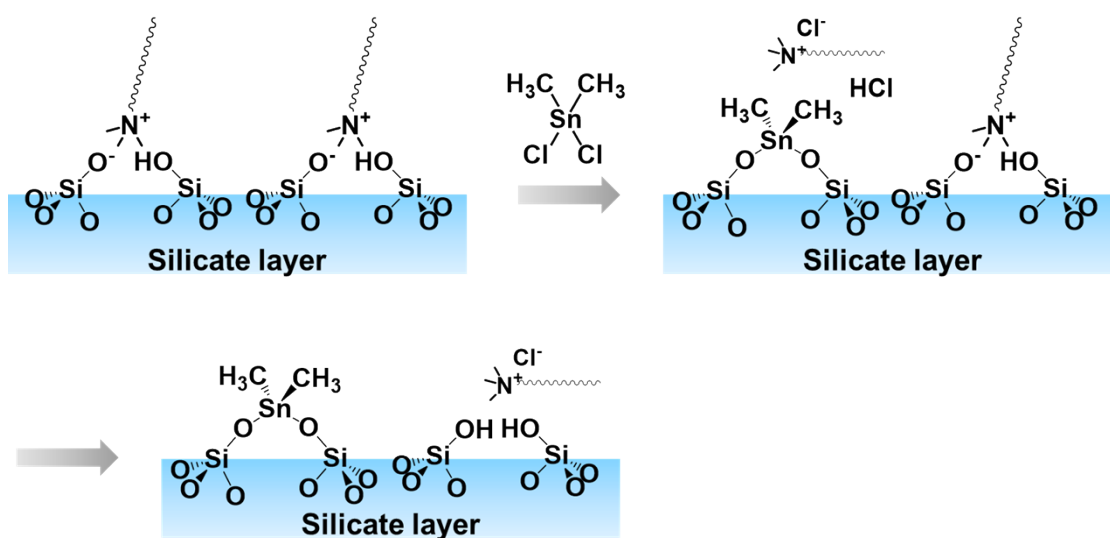

Scheme S1 Possible reaction scheme for the elimination of two C<sub>16</sub>TMA<sup>+</sup> cations by the reaction of one Me<sub>2</sub>SnCl<sub>2</sub> molecule.

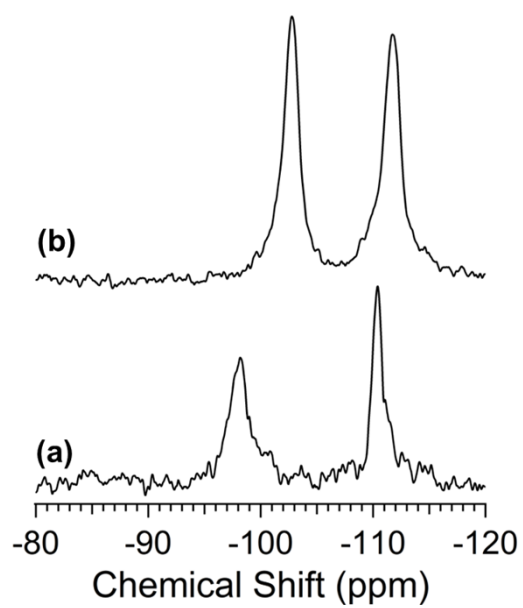

Fig. S6  $^{29}\text{Si}$  MAS NMR spectra of (a) H-Oct and (b) H-Oct\_heat.

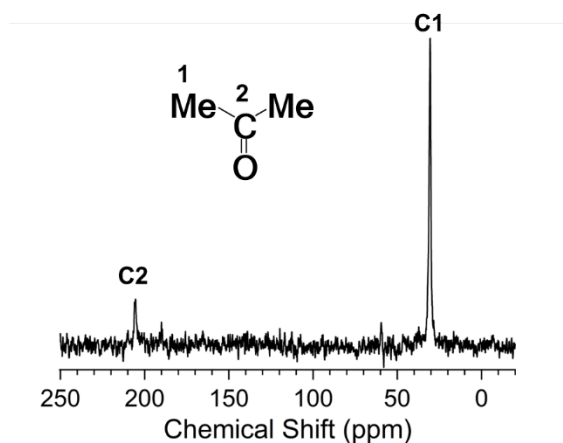

Fig. S7  $^{13}\text{C}$  CP/MAS NMR spectrum of H-Oct<sub>heat</sub>.

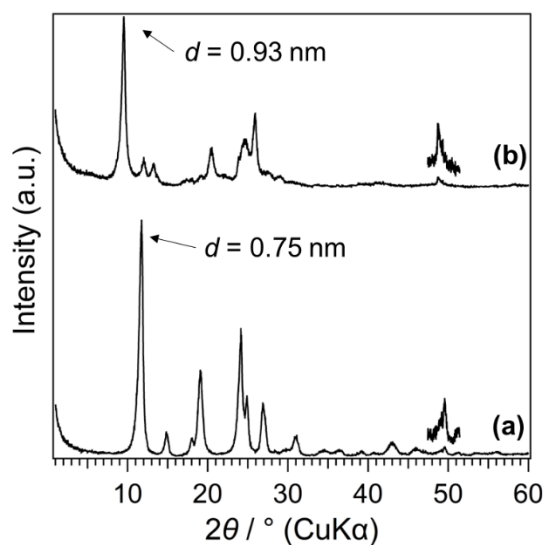

Fig. S8 Powder XRD patterns of (a) H-Oct and (b) H-Oct<sub>heat</sub>.

H-Oct and H-Oct<sub>heat</sub> were analyzed by  $^{13}\text{C}$  CP/MAS NMR (Fig. S7) and powder XRD (Fig. S8). The presence of acetone in H-Oct<sub>heat</sub> was confirmed by  $^{13}\text{C}$  NMR spectrum. The basal spacing of H-Oct<sub>heat</sub> increased from that of H-Oct, which was generally consistent with the profile of the XRD pattern for acetone-adsorbed H-octosilicate reported previously.<sup>2</sup> These results suggested that acetone as a washing solvent was intercalated between the layers.



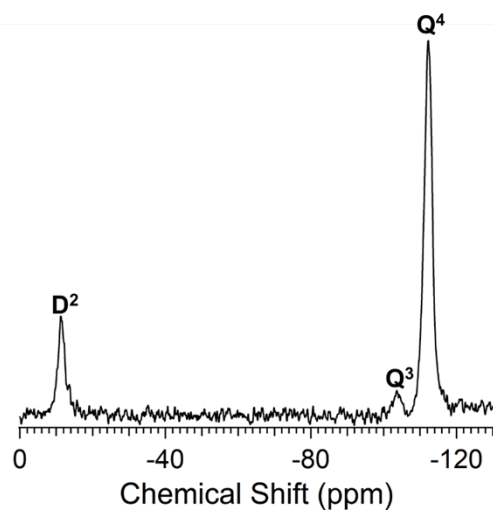

Fig. S9  $^{29}\text{Si}$  MAS NMR spectrum of  $\text{Me}_2\text{Si-Oct}$ .

Table S3 Integral intensity ratios of the  $^{29}\text{Si}$  MAS NMR signals (Fig. S9) and the degree of silylation for  $\text{Me}_2\text{Si-Oct}$ .

| Samples                    | Integral intensity ratio |                |                | Degree of silylation / % |
|----------------------------|--------------------------|----------------|----------------|--------------------------|
|                            | D <sup>2</sup>           | Q <sup>3</sup> | Q <sup>4</sup> |                          |
| $\text{Me}_2\text{Si-Oct}$ | 0.43                     | 0.12           | 1.88           | 88                       |

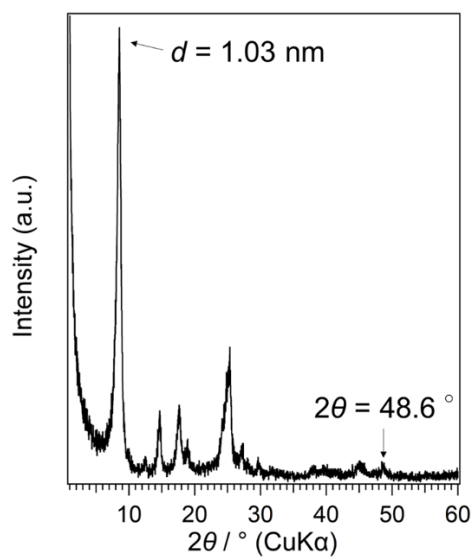

Fig. S10 Powder XRD pattern of  $\text{Me}_2\text{Si-Oct}$ .

(a)

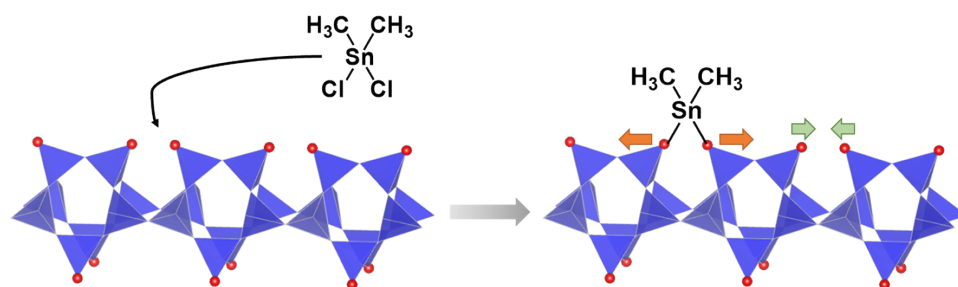

(b)

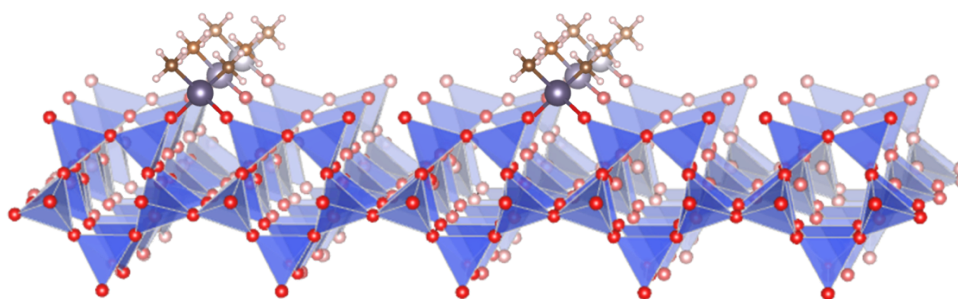

Scheme S2 (a) A possible mechanism that explains the limited degree of dimethyltin-modification (approximately 50%). (b) A possible structure of  $\text{Me}_2\text{Sn-Oct}_{10}$ .

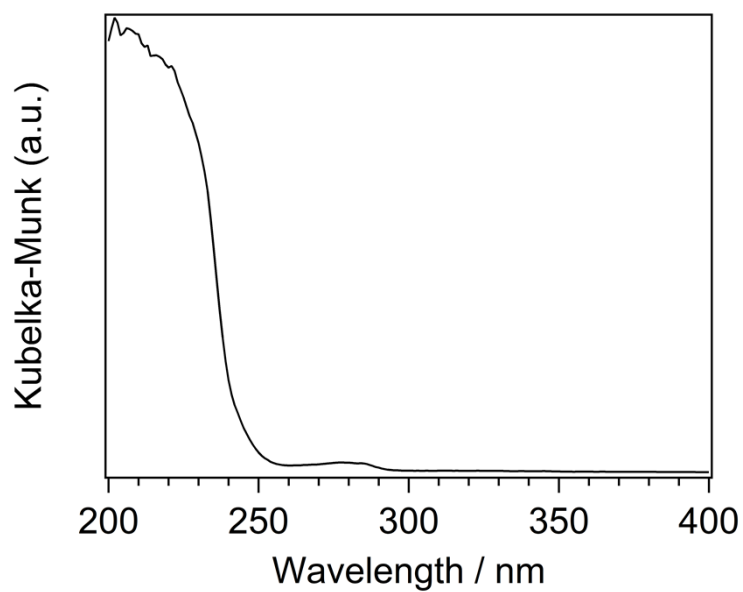

Fig. S11 UV-Vis spectrum of dimethyltin oxide.

Table S4 The values of the absorption edge for each spectrum.

| Samples                     | Absorption edges / eV |
|-----------------------------|-----------------------|
| Sn foil                     | 29195.0               |
| SnO                         | 29196.8               |
| SnO <sub>2</sub>            | 29200.6               |
| DMTO                        | 29198.6               |
| Me <sub>2</sub> Sn-Oct_0.1  | 29197.2               |
| Me <sub>2</sub> Sn-Oct_0.25 | 29197.1               |
| Me <sub>2</sub> Sn-Oct_0.5  | 29197.2               |
| Me <sub>2</sub> Sn-Oct_10   | 29197.2               |

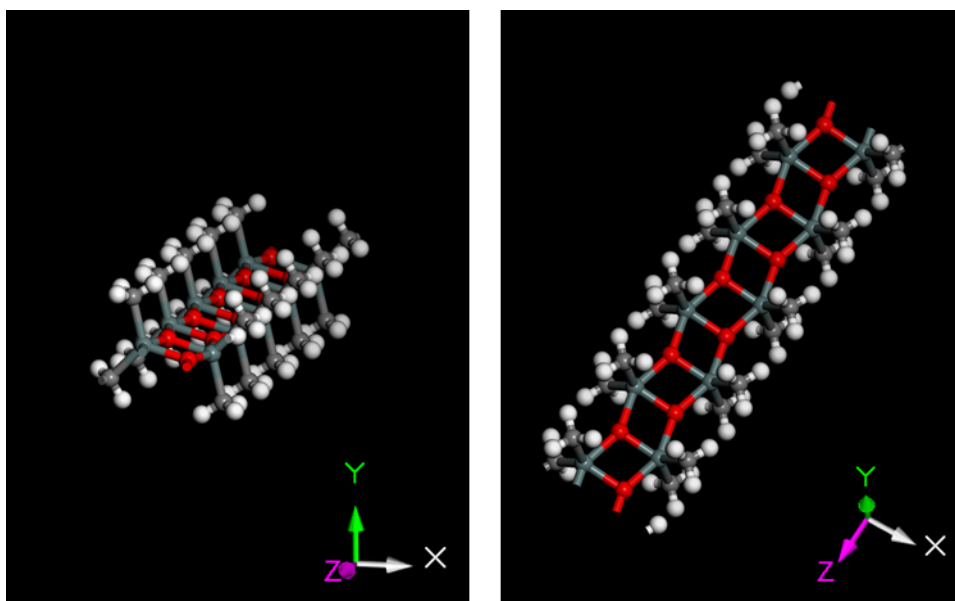

Fig. S12 A structural model of dimethyltin oxide.

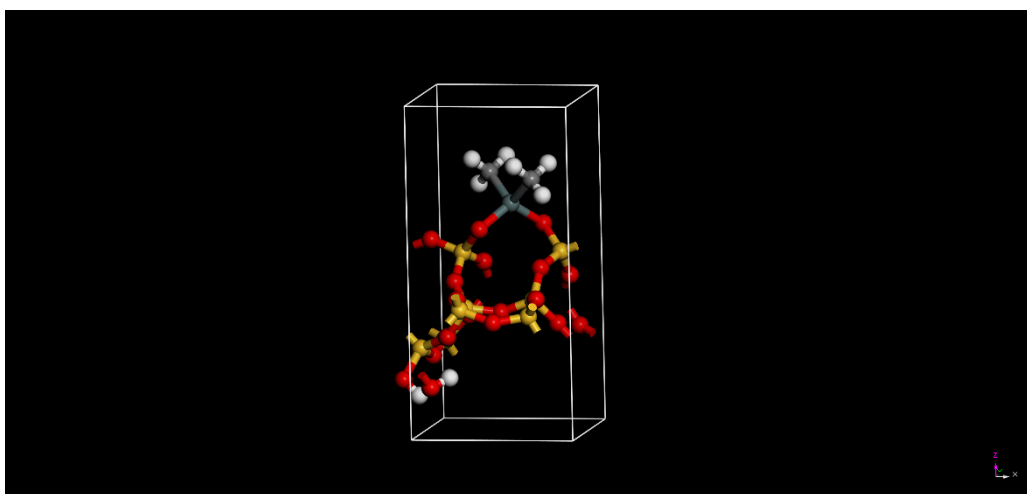

Fig. S13 A structural model of Me<sub>2</sub>Sn-Oct\_X.

## References

- 1 B. B. Kharkov and S. V. Dvinskikh, *J. Phys. Chem. C*, 2013, **117**, 24511–24517.
- 2 M. Borowski, O. Kovalev and H. Gies, *Microporous Mesoporous Mater.*, 2008, **107**, 71–80.
